# Supplementary material for: Proteomic and Phenotypic Analyses of a Putative Glycerol-3-Phosphate Dehydrogenase Required for Virulence in Acidovorax citrulli
Source: PubMed Central journal article supplement — Plant Pathol J. 2021 Feb 1;37(1):36–46. doi: 10.5423/PPJ.OA.12.2020.0221 (PMC7847757; doi:10.5423/ppj.oa.12.2020.0221), 2021-02-01
Supplement: ppj-37-1-36-supple.pdf [file ppj-37-1-36-supple.pdf]

**Supplementary Table 1.** Bacterial strains and plasmids used in this study

| Bacterial strains and plasmids | Characteristics                                                                                                                        | Source or reference  |
|--------------------------------|----------------------------------------------------------------------------------------------------------------------------------------|----------------------|
| <i>Escherichia coli</i>        |                                                                                                                                        |                      |
| DH5 $\alpha$                   | Strain used for cloning                                                                                                                | Promega              |
| EC100D                         | Strain used for generating Tn5 inserted plasmids                                                                                       | Epicentre            |
| <i>Acidovorax citrulli</i>     |                                                                                                                                        |                      |
| KACC17005                      | Wild-type, Rif <sup>r</sup>                                                                                                            | Park et al. (2017)   |
| <i>Ac</i> (EV)                 | Wild-type carrying the pBBR1-MCS5, Rif <sup>r</sup> , Gm <sup>r</sup>                                                                  | This study           |
| $\Delta$ GlpdAc                | Tn5 insertional knock out mutant in glycerol-3-phosphate dehydrogenase (GlpdAc), Rif <sup>r</sup> , Km <sup>r</sup>                    | This study           |
| $\Delta$ GlpdAc (EV)           | Glycerol-3-phosphate dehydrogenase (GlpdAc) knock out mutant carrying pBBR1-MCS5, Rif <sup>r</sup> , Km <sup>r</sup> , Gm <sup>r</sup> | This study           |
| $\Delta$ GlpdAc (GlpdAc)       | The complemented strain, $\Delta$ G3PdH carrying pBBR1-G3PdH, Rif <sup>r</sup> , Km <sup>r</sup> , Gm <sup>r</sup>                     | This study           |
| Plasmid                        |                                                                                                                                        |                      |
| pGem-T easy                    | TA cloning vector, Am <sup>r</sup>                                                                                                     | Promega              |
| pGem-GlpdAc                    | pGem-T easy inserted by 1058-bp glycerol-3-phosphate dehydrogenase (GlpdAc) fragment by TA ligation, Am <sup>r</sup>                   | This study           |
| pBBR1-MCS5                     | Broad-host-range vector for generation of complemented strain, Gm <sup>r</sup>                                                         | Kovach et al. (1995) |
| PBBR1-GlpdAc                   | pBBR1-MCS5 inserted glycerol-3-phosphate dehydrogenase (GlpdAc) fragment from pGem-G3PdH, Gm <sup>r</sup>                              | This study           |

Rif<sup>r</sup>, Gm<sup>r</sup>, Km<sup>r</sup>, and Am<sup>r</sup> represent resistance to rifampicin, gentamycin, kanamycin, and ampicillin.

## References

- Kovach, M. E., Elzer, P. H., Hill, D. S., Robertson, G. T., Farris, M. A., Roop, R. M. 2nd. and Peterson, K. M. 1995. Four new derivatives of the broad-host-range cloning vector pBBR1MCS, carrying different antibiotic-resistance cassettes. *Gene* 166:175-176.
- Park, H.-J., Seong, H. J., Sul, W. J., Oh, C.-S. and Han, S.-W. 2017. Complete genome sequence of *Acidovorax citrulli* strain KACC17005, a causal agent for bacterial fruit blotch on watermelon. *Korean J. Microbiol.* 53:340-341.

**Supplementary Table 2.** Proteins and PSMs from LC-MS/MS analysis

| Strain                    | 1st     |        | 2nd     |        | 3rd     |        | Shared protein in 3 biological proteins |
|---------------------------|---------|--------|---------|--------|---------|--------|-----------------------------------------|
|                           | Protein | PSM    | Protein | PSM    | Protein | PSM    |                                         |
| <i>Ac</i>                 | 751     | 59,405 | 757     | 58,831 | 752     | 59,569 | 696                                     |
| <i>Ac</i> $\Delta$ GlpdAc | 726     | 59,367 | 695     | 58,960 | 722     | 59,261 | 658                                     |

PSM, peptide spectral match; LC-MS/MS, liquid chromatography-tandem mass spectrometry.

**Supplementary Table 3.** Classification of more abundant (>2 fold) proteins in *Ac* strain by clusters of orthologous group analysis

| COG function                                                               | Accession no. | Gene function                                                                             | Fold change | P-value | Included in other group |
|----------------------------------------------------------------------------|---------------|-------------------------------------------------------------------------------------------|-------------|---------|-------------------------|
| C (energy production and conversion)                                       | ATG94554      | Aldo/keto reductase                                                                       | *           | -       | -                       |
|                                                                            | ATG95415      | Ubiquinone biosynthesis protein UbiH                                                      | *           | -       | H                       |
| E (amino acid metabolism and transport)                                    | ATG92932      | Sulfate ABC transporter ATP-binding protein                                               | *           | -       | -                       |
|                                                                            | ATG93408      | Cysteine synthase CysM                                                                    | *           | -       | -                       |
|                                                                            | ATG94174      | Chorismate synthase                                                                       | *           | -       | -                       |
|                                                                            | ATG94599      | Peptidase M14                                                                             | *           | -       | -                       |
|                                                                            | ATG95284      | Imidazoleglycerol-phosphate dehydratase                                                   | *           | -       | -                       |
| F (nucleotide metabolism and transport)                                    | ATG93697      | HIT domain-containing protein                                                             | *           | -       | G                       |
|                                                                            | ATG95028      | dUTP diphosphatase                                                                        | *           | -       | -                       |
|                                                                            | ATG96186      | Adenine phosphoribosyltransferase                                                         | *           | -       | -                       |
| G (carbohydrate metabolism and transport)                                  | ATG94560      | Fructose 1/6-bisphosphatase                                                               | *           | -       | -                       |
|                                                                            | ATG94961      | C4-dicarboxylate ABC transporter substrate-binding protein                                | *           | -       | -                       |
| H (coenzyme metabolism)                                                    | ATG96454      | Uroporphyrinogen decarboxylase                                                            | 2.70        | 0.005   | -                       |
|                                                                            | ATG93857      | 8-Amino-7-oxononanoate synthase                                                           | *           | -       | -                       |
|                                                                            | ATG93863      | Quinolinate synthase NadA                                                                 | *           | -       | -                       |
|                                                                            | ATG96237      | Riboflavin synthase                                                                       | *           | -       | -                       |
| J (translation)                                                            | ATG93509      | 50S ribosomal protein L33                                                                 | *           | -       | -                       |
|                                                                            | ATG95424      | tRNA (N6-isopentenyl adenosine(37)-C2)-methyltransferase MiaB                             | *           | -       | -                       |
|                                                                            | ATG96211      | Ribosomal RNA small subunit methyltransferase A                                           | *           | -       | -                       |
|                                                                            | ATG96264      | Methionyl-tRNA formyltransferase                                                          | *           | -       | -                       |
|                                                                            | ATG96377      | L-threonylcarbamoyladenylate synthase                                                     | *           | -       | -                       |
|                                                                            | ATG93643      | Bifunctional (p)ppGpp synthetase/guanosine-3'/5'-bis(diphosphate) 3'-pyrophosphohydrolase | *           | -       | T                       |
| K (transcription)                                                          | ATG95456      | IcIR family transcriptional regulator                                                     | *           | -       | -                       |
|                                                                            | ATG94954      | Peptidase                                                                                 | *           | -       | -                       |
|                                                                            | ATG95298      | ABC transporter                                                                           | *           | -       | -                       |
|                                                                            | ATG95317      | Penicillin-binding protein 1A                                                             | *           | -       | -                       |
|                                                                            | ATG96717      | dTDP-4-dehydrorhamnose 3/5-epimerase                                                      | *           | -       | -                       |
| N (cell motility)                                                          | ATG95628      | Twitching motility protein PilT                                                           | *           | -       | U                       |
|                                                                            | ATG95814      | Methyl-accepting chemotaxis protein                                                       | *           | -       | -                       |
| O (post-translational modification, protein turnover, chaperone functions) | ATG93406      | Hypothetical protein CQB05_04600                                                          | *           | -       | -                       |
|                                                                            | ATG93868      | Glutaredoxin 3                                                                            | *           | -       | -                       |
|                                                                            | ATG94255      | Collagenase-like protease                                                                 | *           | -       | -                       |
| P (inorganic ion transport and metabolism)                                 | ATG92949      | Multidrug efflux RND transporter permease subunit                                         | *           | -       | -                       |
|                                                                            | ATG93390      | Sulfurtransferase                                                                         | *           | -       | -                       |
|                                                                            | ATG94583      | Heavy metal translocating P-type ATPase                                                   | *           | -       | -                       |
|                                                                            | ATG94851      | ABC transporter substrate-binding protein                                                 | *           | -       | -                       |
|                                                                            | ATG96541      | Carbonate dehydratase                                                                     | *           | -       | -                       |
|                                                                            | ATG96708      | Sulfurtransferase                                                                         | *           | -       | -                       |

|                         |          |                                                                    |   |   |   |
|-------------------------|----------|--------------------------------------------------------------------|---|---|---|
| S (function unknown)    | ATG92898 | Tripartite tricarboxylate transporter substrate binding protein    | * | - | - |
|                         | ATG93031 | Methyl-accepting chemotaxis protein                                | * | - | - |
|                         | ATG93690 | FmdB family transcriptional regulator                              | * | - | - |
|                         | ATG94166 | NAD(P)-dependent oxidoreductase                                    | * | - | - |
|                         | ATG94412 | Hypothetical protein CQB05_10510                                   | * | - | - |
|                         | ATG94903 | Virulence protein SciE type                                        | * | - | - |
|                         | ATG94931 | Hypothetical protein CQB05_13580                                   | * | - | - |
|                         | ATG95978 | Cluster of type VI secretion system tip protein VgrG               | * | - | - |
|                         | ATG96183 | tRNA uridine-5-carboxymethylaminomethyl(34) synthesis GTPase MnmeE | * | - | - |
|                         | ATG96448 | Universal stress protein                                           | * | - | - |
| T (signal transduction) | ATG94151 | Polyvinylalcohol dehydrogenase                                     | * | - | - |
|                         | ATG96412 | Two-component system response regulator                            | * | - | - |
|                         | ATG96581 | DNA-binding response regulator                                     | * | - | - |

Asterisk indicate the protein is unique to *Ac*.

*Ac*, *Acidovorax citrulli*; COG, clusters of orthologous group.

**Supplementary Table 4.** Classification of more abundant (>2 fold) proteins in *AcΔglpD* strain by clusters of orthologous group analysis

| COG function                                                               | Accession no. | Gene function                                             | Fold change | P-value | Included in other group |
|----------------------------------------------------------------------------|---------------|-----------------------------------------------------------|-------------|---------|-------------------------|
| C (energy production and conversion)                                       | ATG93740      | Ubiquinol-cytochrome c reductase iron-sulfur subunit      | *           | -       | -                       |
| E (amino acid metabolism and transport)                                    | ATG96202      | Peptidase M20                                             | 4.20        | 0.04    | -                       |
|                                                                            | ATG96066      | D-amino acid dehydrogenase                                | *           | -       | -                       |
| H (coenzyme metabolism)                                                    | ATG94848      | cob(I)yrinic acid a/c-diamide adenosyltransferase         | *           | -       | -                       |
|                                                                            | ATG96398      | Glutathione synthase                                      | *           | -       | -                       |
| I (lipid metabolism)                                                       | ATG93257      | Acyl-CoA dehydrogenase                                    | *           | -       | -                       |
|                                                                            | ATG96543      | Acetyl-CoA C-acyltransferase                              | *           | -       | -                       |
|                                                                            | ATG96632      | 3-Hydroxybutyryl-CoA dehydrogenase                        | *           | -       | -                       |
| J (translation)                                                            | ATG94046      | TlyA family RNA methyltransferase                         | *           | -       | -                       |
| K (transcription)                                                          | ATG93025      | Fe-S cluster assembly transcriptional regulator IscR      | *           | -       | -                       |
|                                                                            | ATG93642      | DNA-directed RNA polymerase subunit omega                 | *           | -       | -                       |
| L (replication and repair)                                                 | ATG96328      | DNA helicase II                                           | *           | -       | -                       |
| M (cell wall/membrane/envelop biogenesis)                                  | ATG94570      | UDP-3-O-(3-hydroxymyristoyl)glucosamine N-acyltransferase | *           | -       | -                       |
|                                                                            | ATG95133      | Glycosyltransferase family 1 protein                      | *           | -       | -                       |
|                                                                            | ATG95273      | UDP-glucose 4-epimerase GalE                              | *           | -       | -                       |
| O (post-translational modification, protein turnover, chaperone functions) | ATG93858      | 7-Carboxy-7-deazaguanine synthase                         | *           | -       | -                       |
| P (inorganic ion transport and metabolism)                                 | ATG94295      | Catalase peroxidase                                       | *           | -       | -                       |
| Q (secondary structure)                                                    | ATG94143      | Imidazolonepropionase                                     | *           | -       | -                       |
| S (function unknown)                                                       | ATG93438      | Chemotaxis protein                                        | *           | -       | -                       |
|                                                                            | ATG93441      | Twin-arginine translocation pathway signal                | *           | -       | -                       |
|                                                                            | ATG93629      | Hypothetical protein CQB05_05935                          | *           | -       | -                       |
|                                                                            | ATG94461      | Serine protease                                           | *           | -       | -                       |
|                                                                            | ATG95025      | Cupin domain-containing protein                           | *           | -       | -                       |
|                                                                            | ATG96283      | Hypothetical protein CQB05_21490                          | *           | -       | -                       |
| T (signal transduction)                                                    | ATG95368      | Methyl-accepting chemotaxis protein                       | *           | -       | -                       |
|                                                                            | ATG96144      | DNA-binding response regulator                            | *           | -       | -                       |
|                                                                            | ATG97068      | Hypothetical protein CQB05_19715                          | *           | -       | -                       |

Asterisk indicate the protein is unique to *AcΔglpD*.

*Ac*, *Acidovorax citrulli*; COG, clusters of orthologous group.
